# Supplementary material for: Six cobalt(ii), zinc(ii), nickel(ii) and copper(ii) complexes based on bis-benzimidazolyl bidentate ligands with phenolyl ether linkers: synthesis, structural studies and recognition of HSO4−
Source: Royal Society of Chemistry journal article supplement (doi:10.1039/d4ce00553h), 2024-01-01
Supplement: d4ce00553h1.pdf [file d4ce00553h1.pdf]

## Supplementary Information

### Six cobalt(II), zinc(II), nickel(II) and copper(II) complexes based on bis-benzimidazolyl bidentate ligands with phenolyl ether linkers: synthesis, structural studies and recognition for $\text{HSO}_4^-$

Zhixiang Zhao,<sup>a</sup> Yue Yang,<sup>a</sup> Linhai Hu,<sup>a</sup> Jianhua Wang,<sup>a</sup> Jie Yu<sup>a</sup> and Qingxiang Liu<sup>\*a</sup>

<sup>a</sup> Tianjin Key Laboratory of Structure and Performance for Functional Molecules, College of Chemistry, Tianjin Normal University, Tianjin 300387, P. R. China.

\* Corresponding author, E-mail: tjnulqx@163.com

#### Table of Contents

1. General procedures.
2. X-ray data collection and structure determinations.
3. CCDC numbers for complexes **1-6**.
4. Summary of crystallographic data for complexes **1-6** (Table S1-Table S2).
5. The data of hydrogen bonds,  $\pi$ - $\pi$  interactions and C-H $\cdots$  $\pi$  contacts of complexes **1-6** (Table S3-Table S4).
6. The solid-state fluorescences of **L**<sub>1</sub>-**L**<sub>3</sub> and complexes **1-6** (Fig. S1-Fig. S3).
7. The simulated and the experimental PXRD patterns for complexes **1-6** (Fig. S4-Fig. S9).
8. The curves of thermogravimetric analysis for complexes **1-6** (Fig. S10-Fig. S15).
9. The Fig.s of fluorescence and UV/vis spectroscopies for complex **1** (Fig. S16-Fig. S23).
10. The Fig. of HRMS for **1**· $\text{HSO}_4^-$  (Fig. S24).
11. Infrared spectra of **1** and **1**· $\text{HSO}_4^-$  (Fig. S25).

## 1. General procedures

All solvents, reagents were purchased commercially and were not further purified before use. A Bruker AVANCE III spectrometer was used to record NMR spectra. HRMS was obtained on the mass spectrometer (A VG ZAB-HS). The elemental analyses were obtained by using a Perkin-Elmer 2400C Elemental Analyzer. IR spectra (KBr), fluorescence spectra and UV spectra were gotten by a Bruker Equinox 55 spectrometer, a RF-5301PC fluorescence spectrophotometer (Shimadzu) and a JASCO-V570 spectrometer, respectively. The elemental analyses were performed using a Perkin-Elmer 2400C Elemental Analyzer. The solid-state fluorescence spectra were obtained using a Fluorolog-3 fluorescence spectrophotometer from Horiba Jobin Yvon. The powder X-ray diffraction patterns were recorded using aD/Max-III A diffractometer with a Cu-target tube ( $\lambda = 1.5418 \text{ \AA}$ ) and a graphite monochromator. Thermogravimetric analysis (TG) was performed in  $\text{N}_2$  at a heating rate of  $20 \text{ }^\circ\text{C min}^{-1}$  using a NETZSCH TG209F3.

## 2. X-ray data collection and structure determinations

A Bruker Apex II CCD diffractometer was utilized to collect diffraction data for complexes **1-6**. SADABS and SAINT the program were used.<sup>1</sup> All structures were solved by direct methods by using the SHELXS program of the SHELXTL package and refined with SHELXL.<sup>2</sup> Figures were generated by using Crystal-Maker.<sup>3</sup> Further details were listed in Table S1 and Table S2.

## 3. CCDC numbers for complexes 1-6.

CCDC 2350976-2350979 and 2350981-2350982 for complexes **1-6** contain the supplementary crystallographic data. These data can be obtained free of charge via <http://www.ccdc.cam.ac.uk/conts/retrieving.html>, or from the Cambridge Crystallographic Data Centre, 12 Union Road, Cambridge, CB2 1EZ, UK; fax: (+44) 1223-336-033; or e-mail: [deposit@ccdc.cam.ac.uk](mailto:deposit@ccdc.cam.ac.uk).

#### 4. Summary of crystallographic data for complexes 1-6.

**Table S1. Summary of Crystallographic Data for Complexes 1-3**

|                                                                  | 1                                                                | 2                                                                | 3                                                                               |
|------------------------------------------------------------------|------------------------------------------------------------------|------------------------------------------------------------------|---------------------------------------------------------------------------------|
| chemical formula                                                 | C <sub>29</sub> H <sub>24</sub> N <sub>6</sub> O <sub>8</sub> Co | C <sub>29</sub> H <sub>24</sub> N <sub>6</sub> O <sub>8</sub> Zn | C <sub>62</sub> H <sub>56</sub> N <sub>12</sub> O <sub>16</sub> Ni <sub>2</sub> |
| fw                                                               | 643.47                                                           | 649.91                                                           | 1342.61                                                                         |
| Cryst syst                                                       | Monoclinic                                                       | Monoclinic                                                       | Triclinic                                                                       |
| space group                                                      | <i>P</i> 2 <sub>1</sub> / <i>c</i>                               | <i>P</i> 2 <sub>1</sub> / <i>c</i>                               | <i>P</i> $\bar{1}$                                                              |
| <i>a</i> /Å                                                      | 15.662(1)                                                        | 15.603(1)                                                        | 7.842(4)                                                                        |
| <i>b</i> /Å                                                      | 8.770(5)                                                         | 8.651(8)                                                         | 11.923(6)                                                                       |
| <i>c</i> /Å                                                      | 20.845(1)                                                        | 20.841(1)                                                        | 16.445(9)                                                                       |
| $\alpha$ /deg                                                    | 90                                                               | 90                                                               | 89.7(1)                                                                         |
| $\beta$ /deg                                                     | 99.8(1)                                                          | 101.0(1)                                                         | 87.6(1)                                                                         |
| $\gamma$ /deg                                                    | 90                                                               | 90                                                               | 73.4(1)                                                                         |
| <i>V</i> /Å <sup>3</sup>                                         | 2821.1(3)                                                        | 2761.4(4)                                                        | 1473.1(1)                                                                       |
| <i>Z</i>                                                         | 4                                                                | 4                                                                | 1                                                                               |
| <i>D</i> <sub>calcd</sub> , Mg/m <sup>3</sup>                    | 1.515                                                            | 1.563                                                            | 1.513                                                                           |
| Abs coeff, mm <sup>-1</sup>                                      | 0.672                                                            | 0.954                                                            | 0.722                                                                           |
| <i>F</i> (000)                                                   | 1324                                                             | 1336                                                             | 696                                                                             |
| Cryst size, mm                                                   | 0.22 × 0.20 × 0.18                                               | 0.15 × 0.14 × 0.13                                               | 0.15 × 0.14 × 0.05                                                              |
| $\theta_{\min}$ , $\theta_{\max}$ , deg                          | 1.98, 25.01                                                      | 1.33, 25.01                                                      | 1.24, 25.00                                                                     |
| <i>T</i> /K                                                      | 296(2)                                                           | 296(2)                                                           | 296(2)                                                                          |
| no. of data collected                                            | 13997                                                            | 13575                                                            | 7389                                                                            |
| no. of unique data                                               | 4979                                                             | 4874                                                             | 5101                                                                            |
| no. of refined params                                            | 397                                                              | 397                                                              | 415                                                                             |
| goodness-of-fit on <i>F</i> <sup>2</sup> <sup>a</sup>            | 1.009                                                            | 1.051                                                            | 1.049                                                                           |
| Final <i>R</i> indices <sup>b</sup> [ <i>I</i> > 2σ( <i>I</i> )] |                                                                  |                                                                  |                                                                                 |
| <i>R</i> <sub>1</sub>                                            | 0.0386                                                           | 0.0297                                                           | 0.0276                                                                          |
| <i>wR</i> <sub>2</sub>                                           | 0.0916                                                           | 0.0821                                                           | 0.0693                                                                          |
| <i>R</i> indices (all data)                                      |                                                                  |                                                                  |                                                                                 |
| <i>R</i> <sub>1</sub>                                            | 0.0550                                                           | 0.0356                                                           | 0.0304                                                                          |
| <i>wR</i> <sub>2</sub>                                           | 0.1028                                                           | 0.0887                                                           | 0.0720                                                                          |

<sup>a</sup> Goof =  $[\sum \omega(F_o^2 - F_c^2)^2 / (n-p)]^{1/2}$ , where *n* is the number of reflection and *p* is the number of parameters refined. <sup>b</sup> *R*<sub>1</sub> =  $\sum(|F_o| - |F_c|) / \sum|F_o|$ ; *wR*<sub>2</sub> =  $1 / [\sigma^2(F_o^2) + (0.0691P) + 1.4100P]$  where  $P = (F_o^2 + 2F_c^2) / 3$ .

**Table S2. Summary of Crystallographic Data for Complexes 4-6**

|                                                                  | 4                                                                         | 5                                                                                        | 6                                                                |
|------------------------------------------------------------------|---------------------------------------------------------------------------|------------------------------------------------------------------------------------------|------------------------------------------------------------------|
| chemical formula                                                 | C <sub>29</sub> H <sub>24</sub> N <sub>4</sub> O <sub>6</sub> SCu<br>·DMF | C <sub>32</sub> H <sub>30</sub> N <sub>4</sub> O <sub>6</sub> SCu<br>·CH <sub>3</sub> OH | C <sub>36</sub> H <sub>3</sub> N <sub>4</sub> O <sub>62</sub> Co |
| fw                                                               | 693.22                                                                    | 694.24                                                                                   | 675.59                                                           |
| Cryst syst                                                       | Triclinic                                                                 | Triclinic                                                                                | Monoclinic                                                       |
| space group                                                      | <i>P</i> $\bar{1}$                                                        | <i>P</i> $\bar{1}$                                                                       | <i>P</i> 2 <sub>1</sub> / <i>n</i>                               |
| <i>a</i> /Å                                                      | 10.546(8)                                                                 | 10.846(1)                                                                                | 11.126(1)                                                        |
| <i>b</i> /Å                                                      | 12.516(9)                                                                 | 11.864(1)                                                                                | 14.273(1)                                                        |
| <i>c</i> /Å                                                      | 12.968(9)                                                                 | 14.141(2)                                                                                | 19.771(1)                                                        |
| $\alpha$ /deg                                                    | 68.8(1)                                                                   | 68.9(2)                                                                                  | 90                                                               |
| $\beta$ /deg                                                     | 79.6(1)                                                                   | 72.7(2)                                                                                  | 94.6(2)                                                          |
| $\gamma$ /deg                                                    | 72.3(1)                                                                   | 73.9(2)                                                                                  | 90                                                               |
| <i>V</i> /Å <sup>3</sup>                                         | 1517.1(1)                                                                 | 1591.7(4)                                                                                | 3129.9(5)                                                        |
| <i>Z</i>                                                         | 2                                                                         | 2                                                                                        | 4                                                                |
| <i>D</i> <sub>calcd</sub> Mg/m <sup>3</sup>                      | 1.518                                                                     | 1.449                                                                                    | 1.434                                                            |
| Abs coeff, mm <sup>-1</sup>                                      | 0.847                                                                     | 0.806                                                                                    | 0.603                                                            |
| <i>F</i> (000)                                                   | 718                                                                       | 722                                                                                      | 1404                                                             |
| Cryst size, mm                                                   | 0.15 × 0.14 × 0.05                                                        | 0.22 × 0.21 × 0.20                                                                       | 0.12 × 0.11 × 0.10                                               |
| $\theta_{\min}$ , $\theta_{\max}$ , deg                          | 1.69, 25.01                                                               | 1.87, 25.01                                                                              | 2.03, 25.01                                                      |
| <i>T</i> /K                                                      | 173(2)                                                                    | 296(2)                                                                                   | 150(2)                                                           |
| no. of data collected                                            | 7667                                                                      | 8160                                                                                     | 15616                                                            |
| no. of unique data                                               | 5301                                                                      | 5582                                                                                     | 5497                                                             |
| no. of refined params                                            | 436                                                                       | 448                                                                                      | 434                                                              |
| goodness-of-fit on <i>F</i> <sup>2</sup> <sup>a</sup>            | 1.067                                                                     | 1.020                                                                                    | 1.049                                                            |
| Final <i>R</i> indices <sup>b</sup> [ <i>I</i> > 2σ( <i>I</i> )] |                                                                           |                                                                                          |                                                                  |
| <i>R</i> <sub>1</sub>                                            | 0.0983                                                                    | 0.0367                                                                                   | 0.0289                                                           |
| <i>wR</i> <sub>2</sub>                                           | 0.2347                                                                    | 0.0941                                                                                   | 0.0727                                                           |
| <i>R</i> indices (all data)                                      |                                                                           |                                                                                          |                                                                  |
| <i>R</i> <sub>1</sub>                                            | 0.2223                                                                    | 0.0445                                                                                   | 0.0328                                                           |
| <i>wR</i> <sub>2</sub>                                           | 0.2993                                                                    | 0.0994                                                                                   | 0.0752                                                           |

<sup>a</sup> Goof =  $[\sum \omega(F_o^2 - F_c^2)^2 / (n-p)]^{1/2}$ , where *n* is the number of reflection and *p* is the number of parameters refined. <sup>b</sup> *R*<sub>1</sub> =  $\Sigma(|F_o| - |F_c|) / \Sigma|F_o|$ ; *wR*<sub>2</sub> =  $1 / [\sigma^2(F_o^2) + (0.0691P) + 1.4100P]$  where  $P = (F_o^2 + 2F_c^2) / 3$ .

5. The data of hydrogen bonds,  $\pi$ - $\pi$  interactions and C-H $\cdots$  $\pi$  contacts of complexes 1-6.

**Table S3. H-Bonding Geometry ( $\text{\AA}$ ,  $^\circ$ ) for complexes 1-3, 5 and 6**

|          | D-H $\cdots$ A                          | D-H      | H $\cdots$ A | D $\cdots$ A | D-H $\cdots$ A |
|----------|-----------------------------------------|----------|--------------|--------------|----------------|
| <b>1</b> | C(15)-H(15A) $\cdots$ O(5) <sup>i</sup> | 0.969(3) | 2.613(3)     | 3.068(4)     | 108.9(8)       |
| <b>2</b> | C(15)-H(15A) $\cdots$ O(5) <sup>i</sup> | 0.970(2) | 2.595(2)     | 3.002(3)     | 105.4(1)       |
| <b>3</b> | C(17)-H(17A) $\cdots$ O(8) <sup>i</sup> | 0.970(1) | 2.244(1)     | 3.202(2)     | 168.9(1)       |
|          | C(7)-H(7) $\cdots$ O(5) <sup>ii</sup>   | 0.930(1) | 2.644(1)     | 3.370(2)     | 135.3(1)       |
| <b>5</b> | C(31)-H(31) $\cdots$ O(5) <sup>i</sup>  | 0.930(3) | 2.681(3)     | 3.523(5)     | 150.7(4)       |
| <b>6</b> | C(21)-H(21) $\cdots$ O(6) <sup>i</sup>  | 0.930    | 2.432(1)     | 3.124(2)     | 171.1(6)       |

Symmetry code: i:  $x, -0.5 - y, 0.5 + z$  for **1**. i:  $-x, -y, 1 - z$  for **2**. i:  $x, y, -1+z$ ; ii:  $1-x, 2-y, 1-z$  for **3**. i:  $1 - x, 1 - y, 1 - z$  for **5**. i:  $1 + x, 2 + y, z$  for **6**.

**Table S4. Distances ( $\text{\AA}$ ) of  $\pi$ - $\pi$  interactions for 1-6**

| Complexes | $\pi$ - $\pi$            |                          |
|-----------|--------------------------|--------------------------|
|           | face-to-face             | center-to-center         |
| <b>1</b>  | 3.394(3) (benzimidazole) | 3.606(1) (benzimidazole) |
|           | 3.575(3) (benzimidazole) | 3.594(2) (benzimidazole) |
| <b>2</b>  | 3.362(3) (benzimidazole) | 3.483(3) (benzimidazole) |
|           | 3.353(3) (benzimidazole) | 3.544(2) (benzimidazole) |
| <b>3</b>  | 3.437(2) (benzimidazole) | 3.458(1) (benzimidazole) |
| <b>4</b>  | 3.330(1) (benzimidazole) | 3.469(2) (benzimidazole) |
| <b>5</b>  | 3.742(4) (benzene)       | 4.376(4) (benzene)       |
| <b>6</b>  | 3.412(2) (benzimidazole) | 3.562(3) (benzimidazole) |

6. The solid-state fluorescence spectra of  $L_1$ - $L_3$  and complexes 1-6

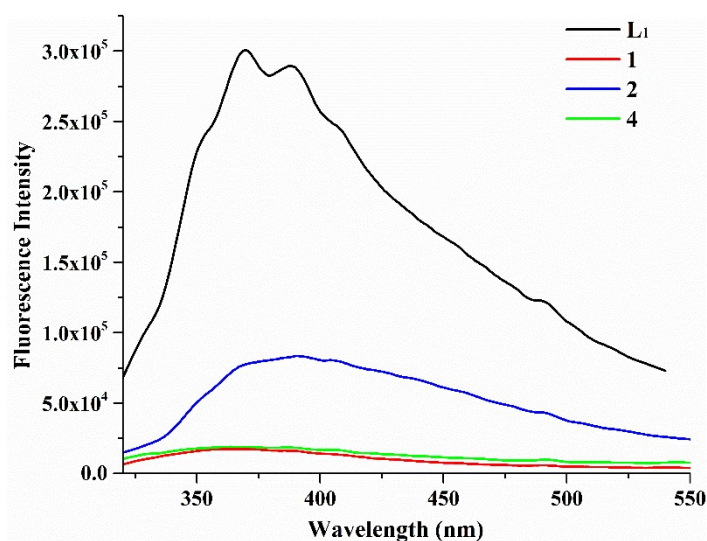

**Fig. S1** The solid-state fluorescence spectra of  $L_1$  and complexes **1**, **2** and **4** at room

temperature ( $\lambda_{\text{ex}} = 300 \text{ nm}$ ).

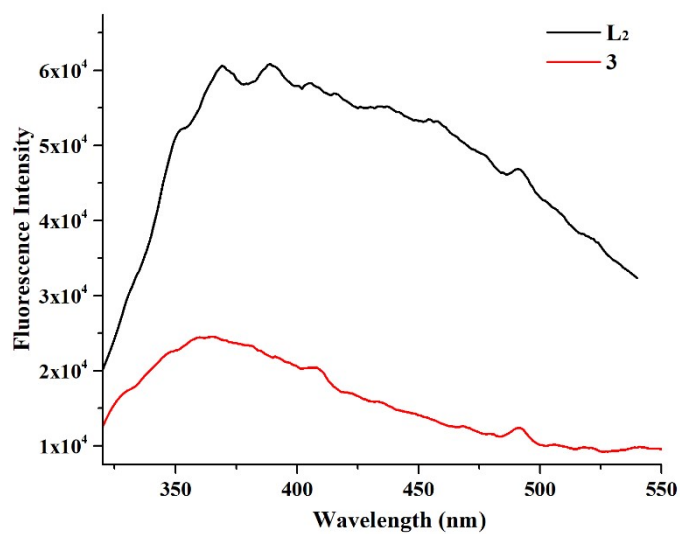

**Fig. S2** The solid-state fluorescence spectra of  $L_2$  and complex **3** at room temperature ( $\lambda_{\text{ex}} = 300 \text{ nm}$ ).

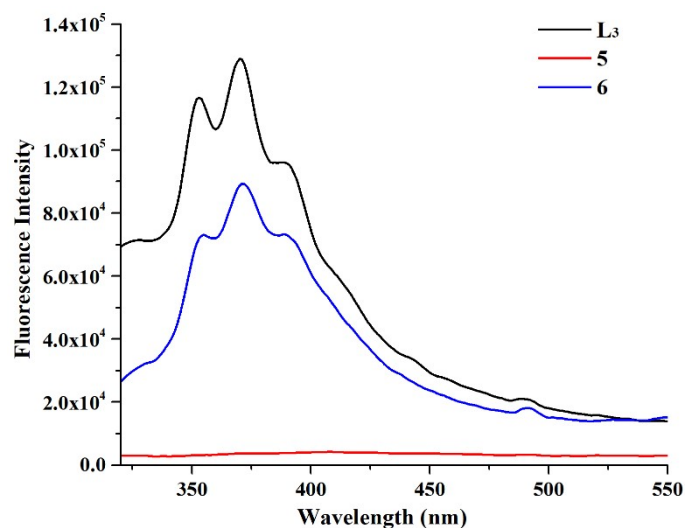

**Fig. S3** The solid-state fluorescence spectra of  $L_3$  and complexes **5** and **6** at room temperature ( $\lambda_{\text{ex}} = 300 \text{ nm}$ ).

## 7. The simulated and experimental PXRD patterns for complexes 1-6

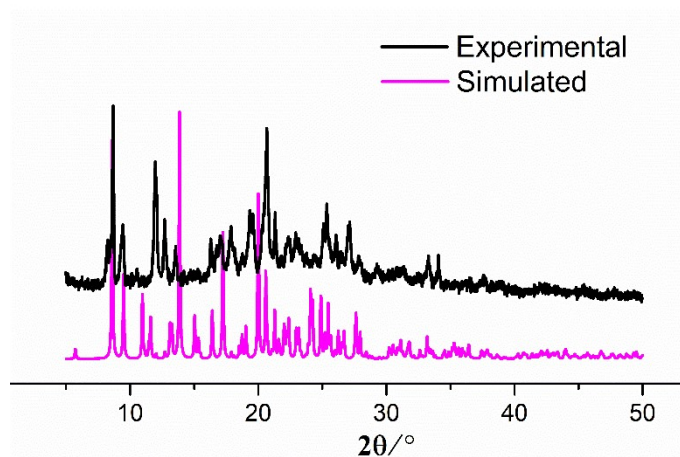

**Fig. S4** The simulated (purple) and the experimental (black) PXRD patterns of **1**.

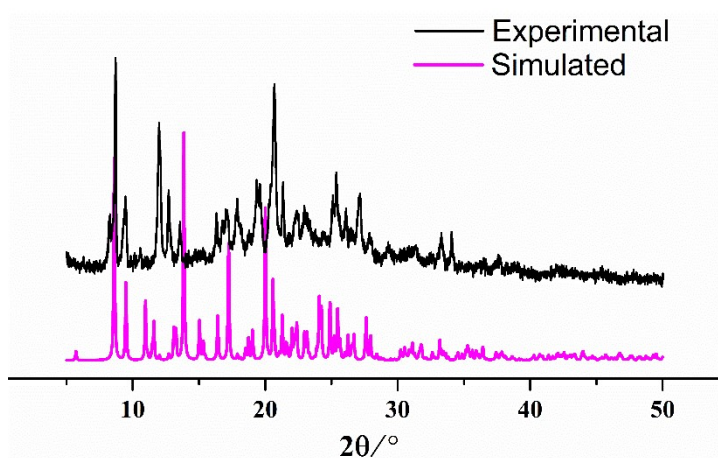

**Fig. S5** The simulated (purple) and the experimental (black) PXRD patterns of **2**.

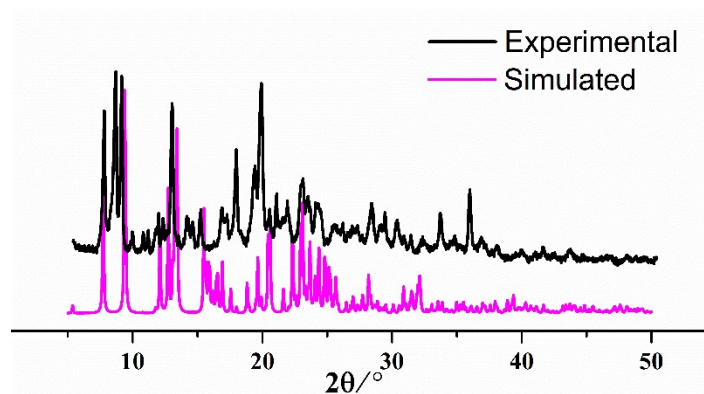

**Fig. S6** The simulated (purple) and the experimental (black) PXRD patterns of **3**.

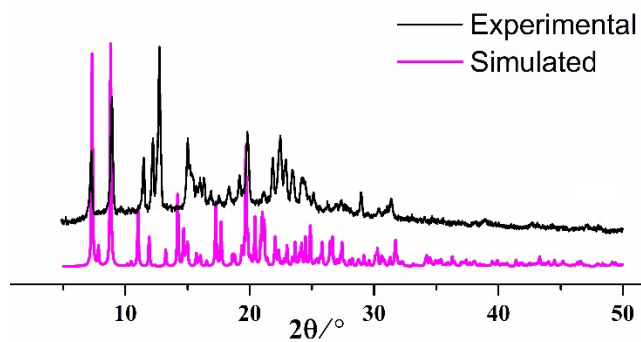

**Fig. S7** The simulated (purple) and the experimental (black) PXRD patterns of **4**.

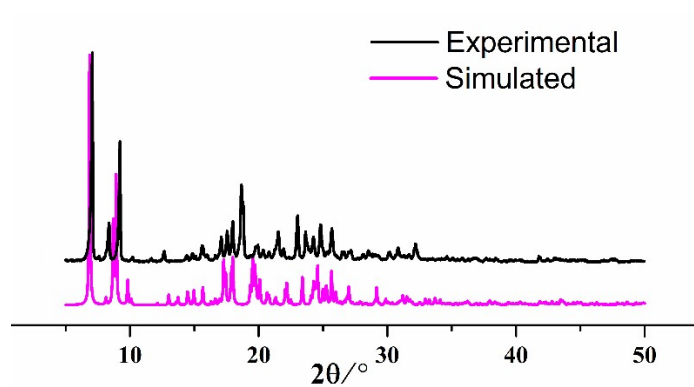

**Fig. S8** The simulated (purple) and the experimental (black) PXRD patterns of **5**.

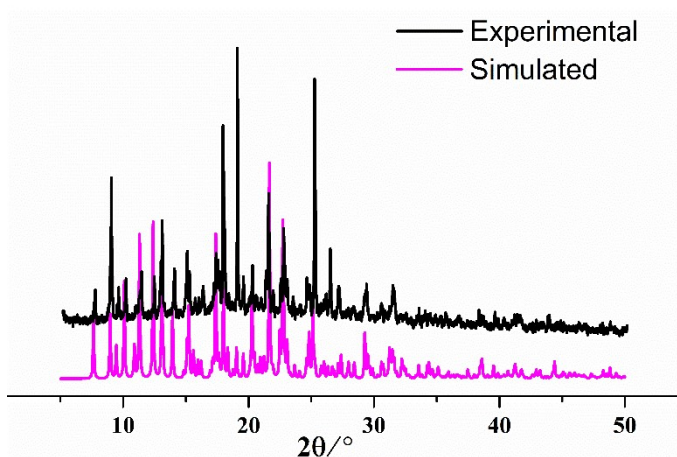

**Fig. S9** The simulated (purple) and the experimental (black) PXRD patterns of **6**.

## 8. The curves of thermogravimetry for complexes 1-6



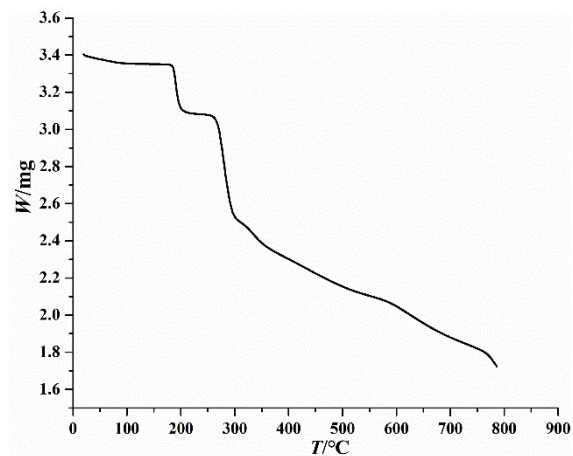

**Fig. S10** TG curve from room temperature to 800 °C for 1.

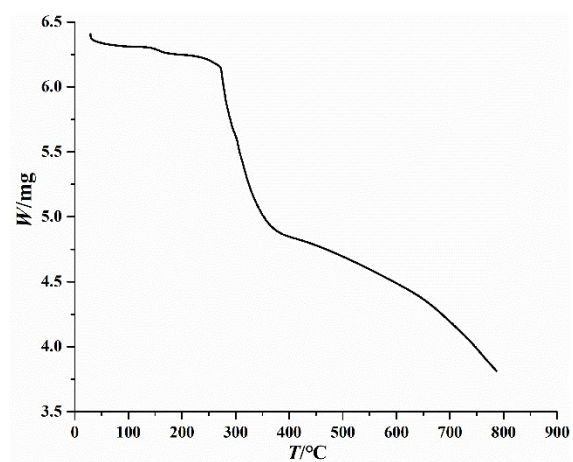

**Fig. S11** TG curve from room temperature to 800 °C for 2.

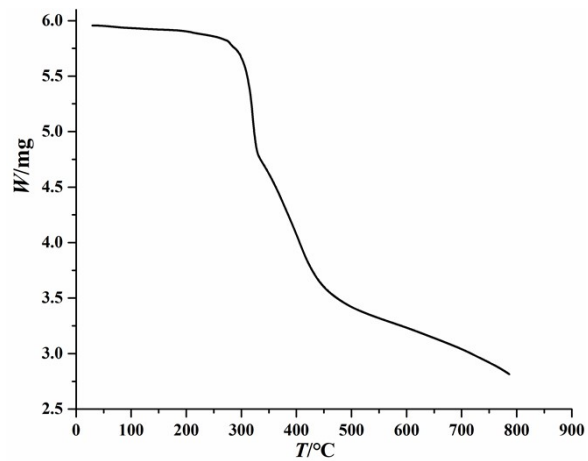

**Fig. S12** TG curve from room temperature to 800 °C for 3.

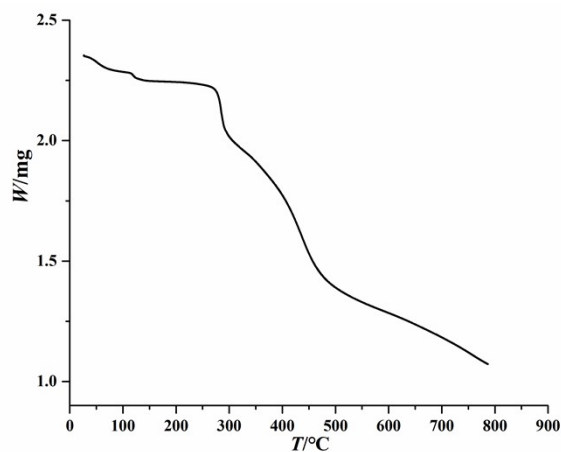

**Fig. S13** TG curve from room temperature to 800 °C for **4**.

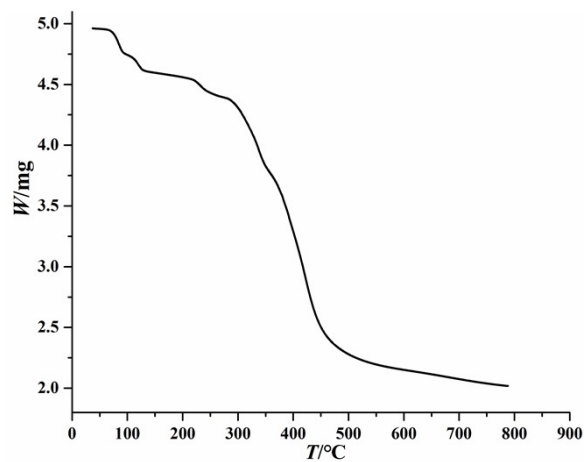

**Fig. S14** TG curve from room temperature to 800 °C for **5**.

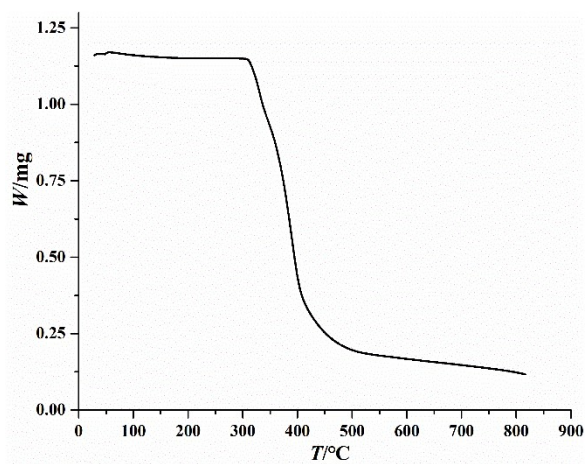

**Fig. S15** TG curve from room temperature to 800 °C for **6**.

**9. The figures of fluorescence and UV/vis spectroscopies for complex 1.**

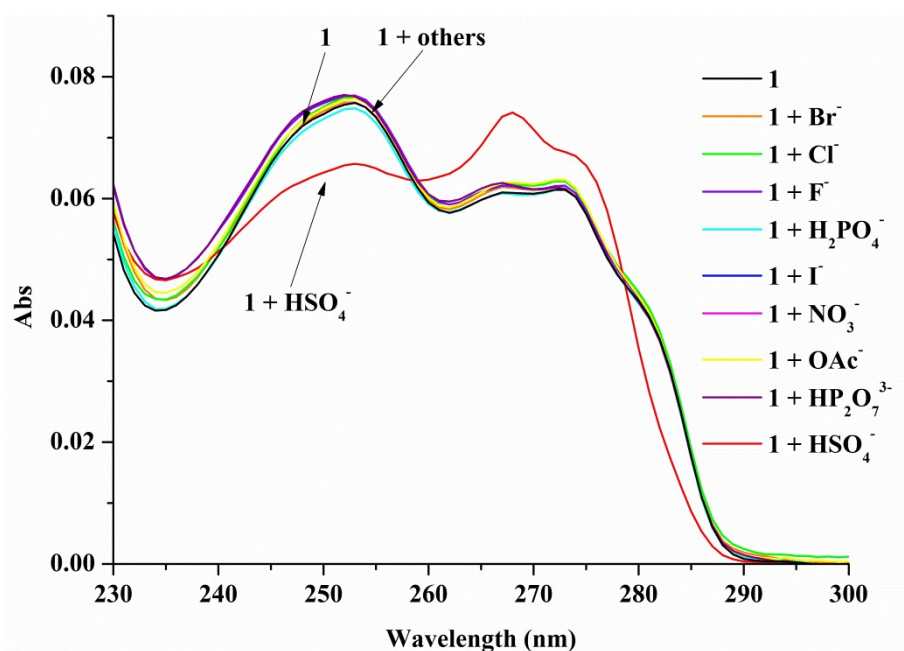

**Fig. S16** UV/vis absorption spectra of **1** ( $5.0 \times 10^{-6}$  mol/L) with salts (20.0 equiv.) of  $F^-$ ,  $Cl^-$ ,  $Br^-$ ,  $I^-$ ,  $H_2PO_4^-$ ,  $OAc^-$ ,  $NO_3^-$ ,  $HSO_4^-$ ,  $P_2O_7^{2-}$  in  $CH_3CN/H_2O$  (1:1, v/v) at room temperature.

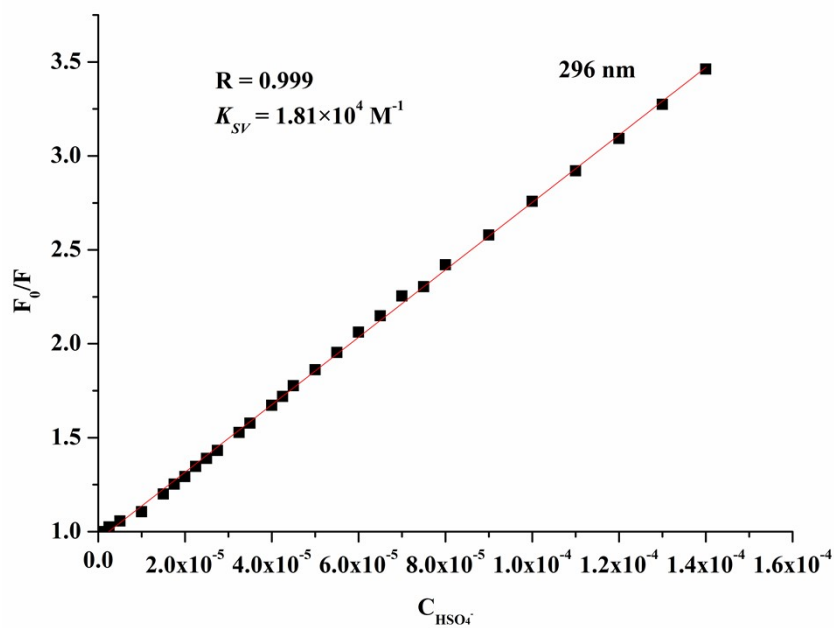

**Fig. S17** Fluorescence titration fitting curve of complex **1** to  $HSO_4^-$ .

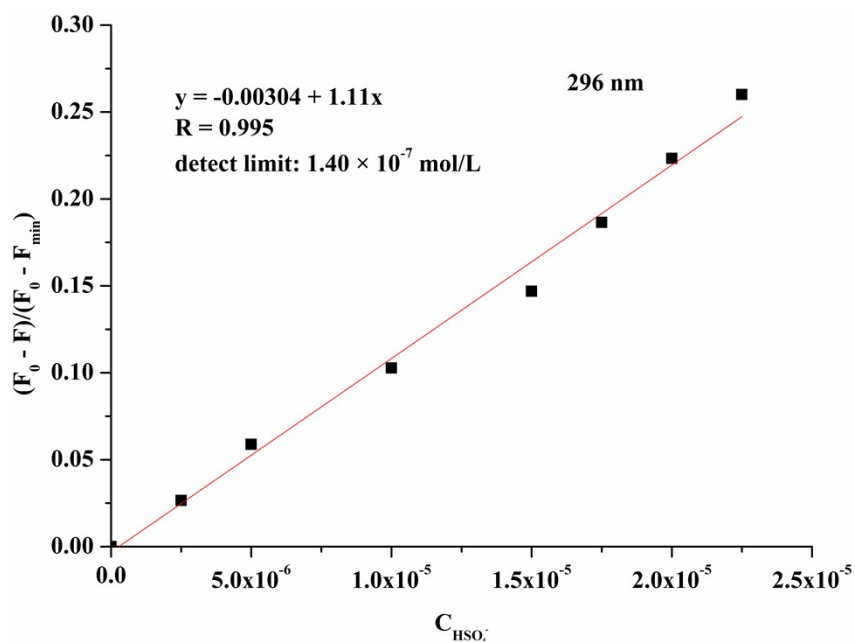

Fig. S18 Detection limit of complex 1 to  $\text{HSO}_4^-$ .

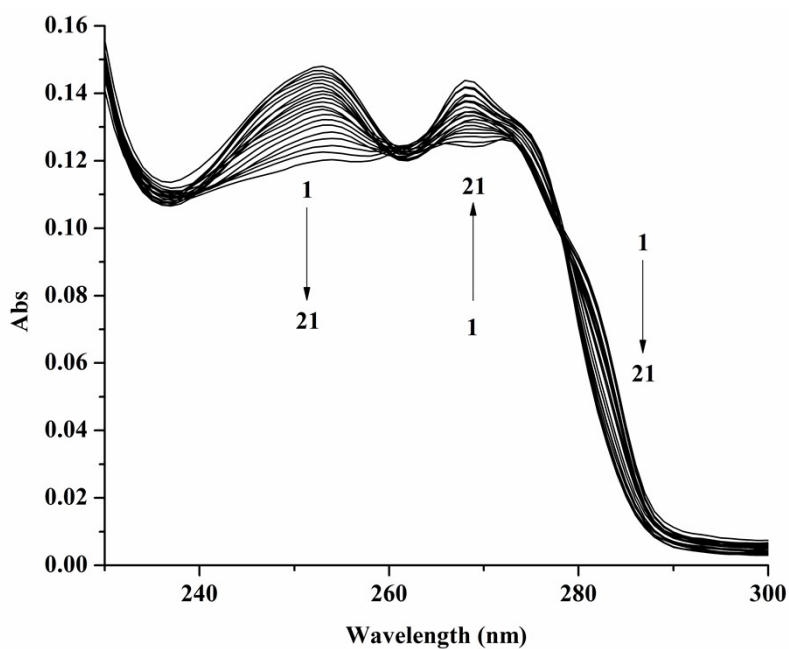

Fig. S19 UV/vis titration of **1** ( $5.0 \times 10^{-6}$  mol/L) with diverse  $C_{\text{HSO}_4^-}$  in  $\text{CH}_3\text{CN}/\text{H}_2\text{O}$  (v:v = 1:1) at room temperature. The concentrations of  $\text{HSO}_4^-$  are 0, 0.5, 1, 2, 3, 4, 5, 6, 7, 8, 9, 10, 11, 12, 14, 16, 18, 20, 25, 30, 35  $\times 10^{-5}$  mol/L.

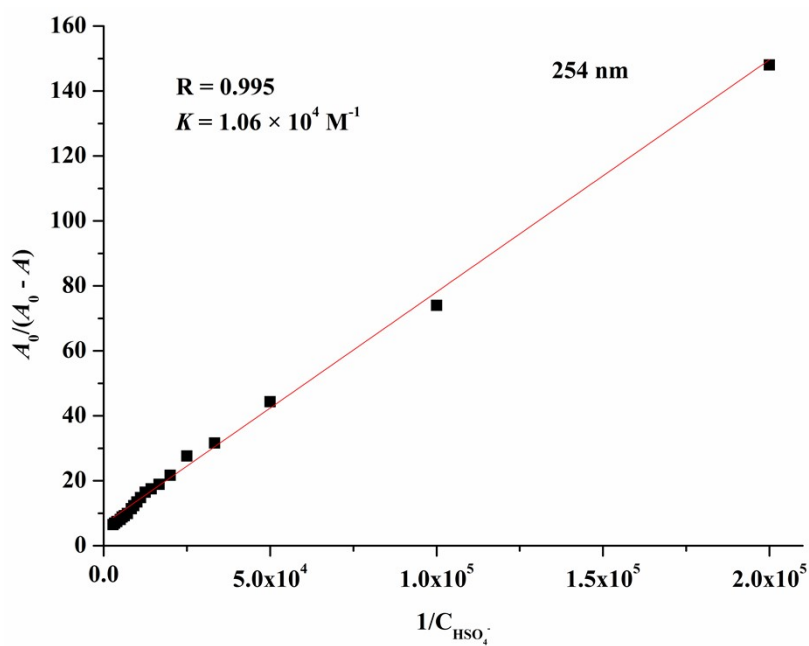

**Fig. S20** UV titration fitting curve of complex **1** to  $\text{HSO}_4^-$ .

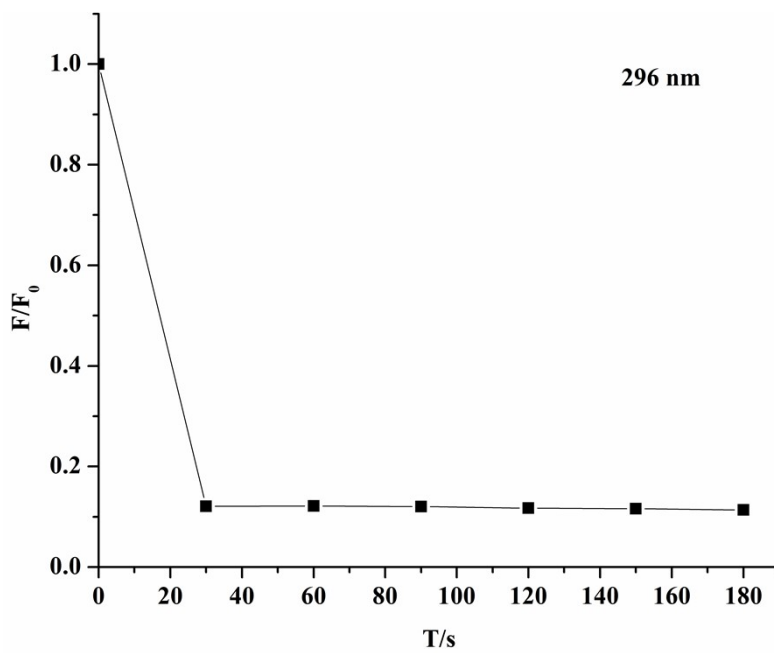

**Fig. S21** Fluorescence response time of complex **1** to  $\text{HSO}_4^-$ .

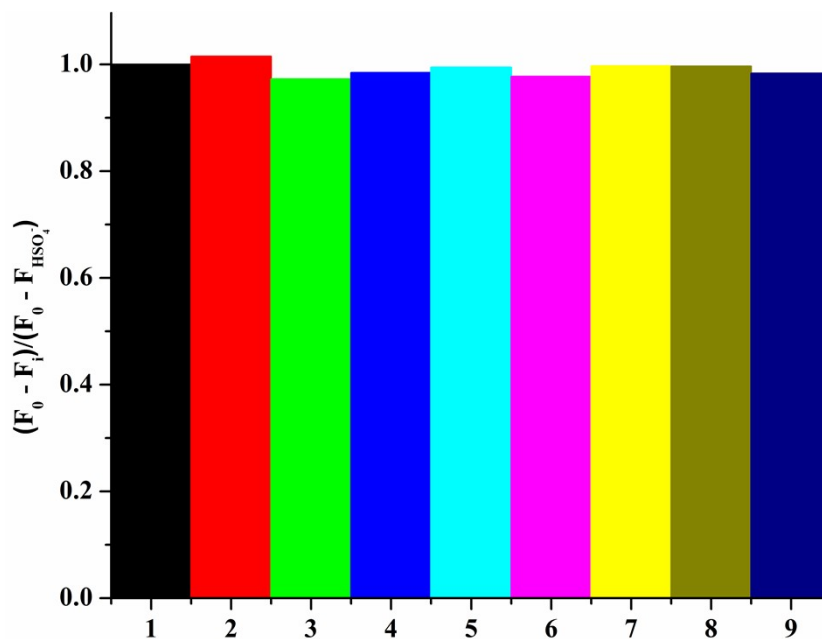

**Fig. S22** Histogram of the interference of complex **1** with  $\text{HSO}_4^-$  at 296 nm (where the horizontal numbers represent the systems 1: **1** +  $\text{HSO}_4^-$ ; 2: **1** +  $\text{HSO}_4^-$  +  $\text{F}^-$ ; 3: **1** +  $\text{HSO}_4^-$  +  $\text{Cl}^-$ ; 4: **1** +  $\text{HSO}_4^-$  +  $\text{Br}^-$ ; 5: **1** +  $\text{HSO}_4^-$  +  $\text{I}^-$ ; 6: **1** +  $\text{HSO}_4^-$  +  $\text{H}_2\text{PO}_4^-$ ; 7: **1** +  $\text{HSO}_4^-$  +  $\text{OAc}^-$ ; 8: **1** +  $\text{HSO}_4^-$  +  $\text{NO}_3^-$ ; 9: **1** +  $\text{HSO}_4^-$  +  $\text{HP}_2\text{O}_7^{3-}$ ).

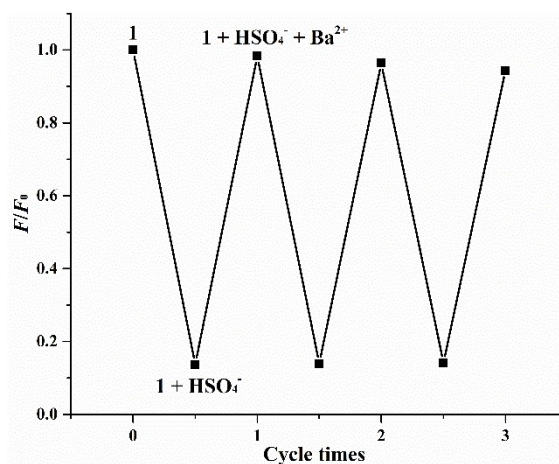

**Fig. 23** Reversibility study of complex **1** ( $5 \times 10^{-6}$  mol/L) for  $\text{HSO}_4^-$  ( $1.0 \times 10^{-4}$  mol/L) in  $\text{CH}_3\text{CN}/\text{H}_2\text{O}$  ( $v/v = 1:1$ ) at 296 nm at room temperature.

#### 10. The Fig. of HRMS for **1** and **1**· $\text{HSO}_4^-$

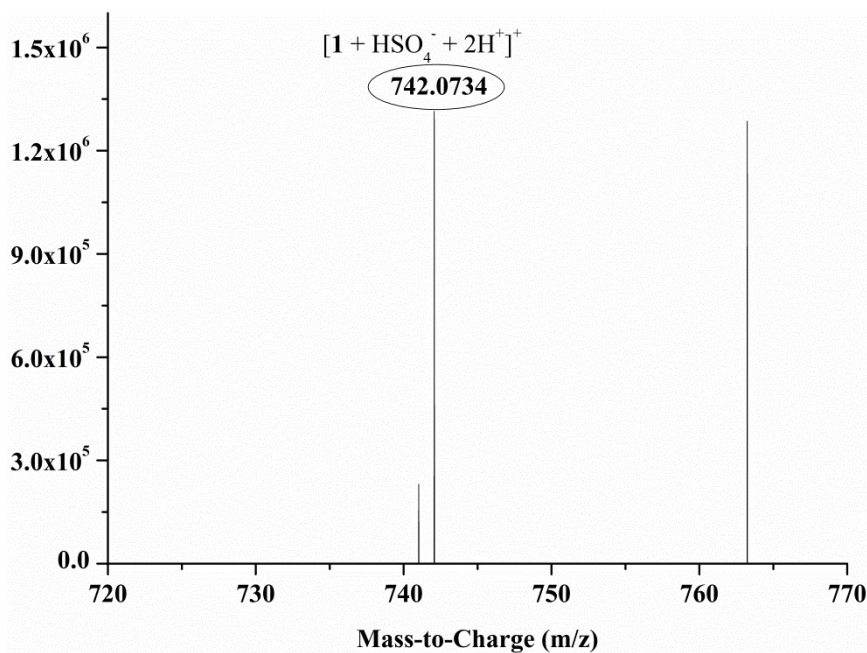

Fig. S24 HRMS of  $1 \cdot \text{HSO}_4^-$ .

### 11. Infrared spectra of 1 and $1 \cdot \text{HSO}_4^-$

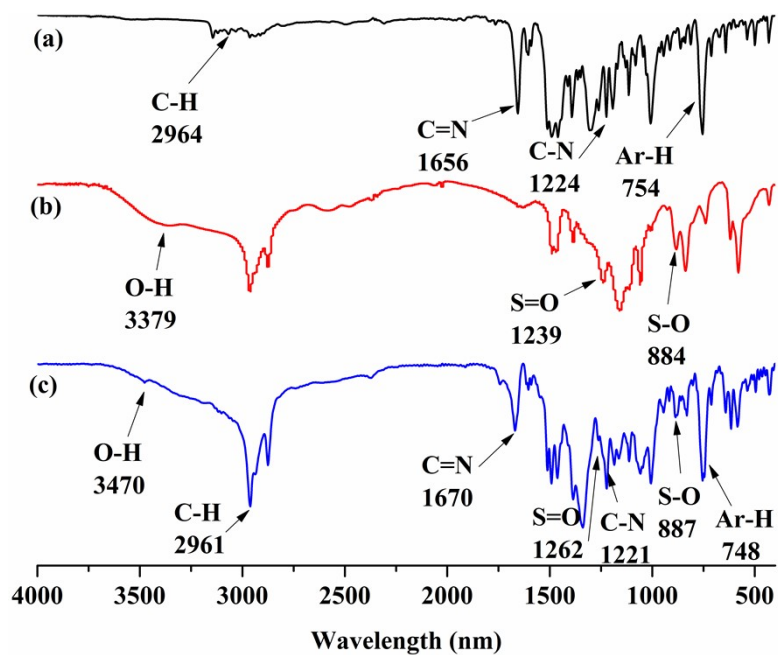

Fig. S25 (a) Infrared image of complex 1; (b) Infrared image of  $\text{HSO}_4^-$ ; (c) Infrared image of  $1 \cdot \text{HSO}_4^-$

### References

S1 AXS, SAINT Software Reference Manual; Bruker: Madison, WI, 1998.

S2 G. M. Sheldrick, SHELXTL NT (Version 5.1), Program for Solution and

Refinement of Crystal Structures, University of Göttingen, Göttingen (Germany),  
1997.

S3 D. C. Palmer, Crystal Maker 7.1.5, CrystalMaker Software: Yarnton, UK, 2006.
